# Supplementary material for: A compact fiber-integrated optofluidic platform for highly specific microRNA Förster resonance energy transfer detection
Source: Royal Society of Chemistry journal article supplement (doi:10.1039/d1an00324k), 2021-01-01
Supplement: d1an00324k1.pdf [file d1an00324k1.pdf]

## Electronic Supplementary Information

# A compact fiber-integrated optofluidic platform for highly specific microRNA Förster resonance energy transfer detection

Hongtao Feng<sup>‡a</sup>, Lin Liu<sup>‡a</sup>, Yi Chen<sup>a</sup>, Weiliang Shu<sup>a</sup>, Yuqing Huang<sup>a</sup>, Baoyue Zhang<sup>a</sup>, Tianzhun Wu<sup>a</sup>, Zongwen Jin<sup>a\*</sup>, and Yan Chen<sup>a\*</sup>

<sup>a</sup> CAS Key Laboratory of Health Informatics, Shenzhen Institutes of Advanced Technology, Chinese Academy of Sciences, 1068 Xueyuan Avenue, Shenzhen 518055, China

\* Corresponding authors. E-mail: yan.chen@siat.ac.cn, zw.jin@siat.ac.cn.

‡ These authors contributed equally to this paper.

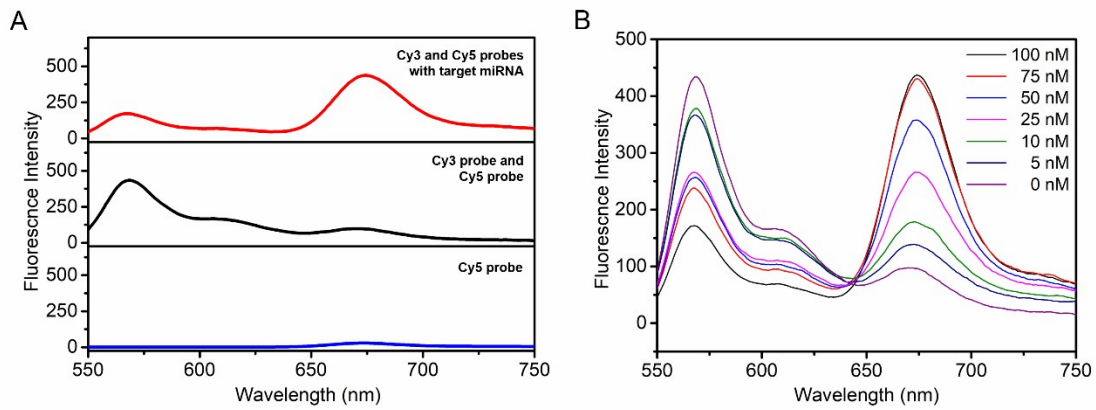

**Figure S1.** (A) Fluorescence spectral responses of Cy5-linked probe (blue), a mixture of Cy3-linked probe and Cy5-linked probe (black), a mixture of Cy3-linked probe and Cy5-linked probe with target miRNA (red). The concentration of each oligonucleotide is 100 nM. (B) Fluorescence spectra on the energy transfer from Cy3 to Cy5 as a function of miRNA concentration. The concentration of each probe is 100 nM.

**Table S1.** Sequences of the oligonucleotides

| <b>Name</b> | <b>Sequence (5'-3')</b>            |
|-------------|------------------------------------|
| miR208 a    | AUA AGA CGA GCA AAA AGC UUG U      |
| miR208 b    | AUA AGA CGA ACA AAA GGU UUG U      |
| miR-195     | UAG CAG CAC AGA AAU AUU GGC        |
| miR-155     | UUA AUG CUA AUC GUG AUA GGG GU     |
| miR-183     | GUG AAU UAC CGA AGG GCC AUA A      |
| Probe1      | ACA AGC TTT TTT TTG ATC-Cy3        |
| Probe2      | AAA AGA TCA(Cy5) AAG CTC GTC TTA T |
| Probe3      | Cy3-ACA AGC TTT TTT TTG ATC        |
| Probe4      | AAA AGA TCA AAG CTC GTC TTA T-Cy5  |

Isomers:

Configuration 1: (probes 1 and 2)

Configuration 2: (probes 3 and 2)

Configuration 3: (probes 3 and 4)
