# Supplementary figures and images for: A compact fiber-integrated optofluidic platform for highly specific microRNA Förster resonance energy transfer detection
Source: Royal Society of Chemistry journal article supplement (doi:10.1039/d1an00324k), 2021-01-01

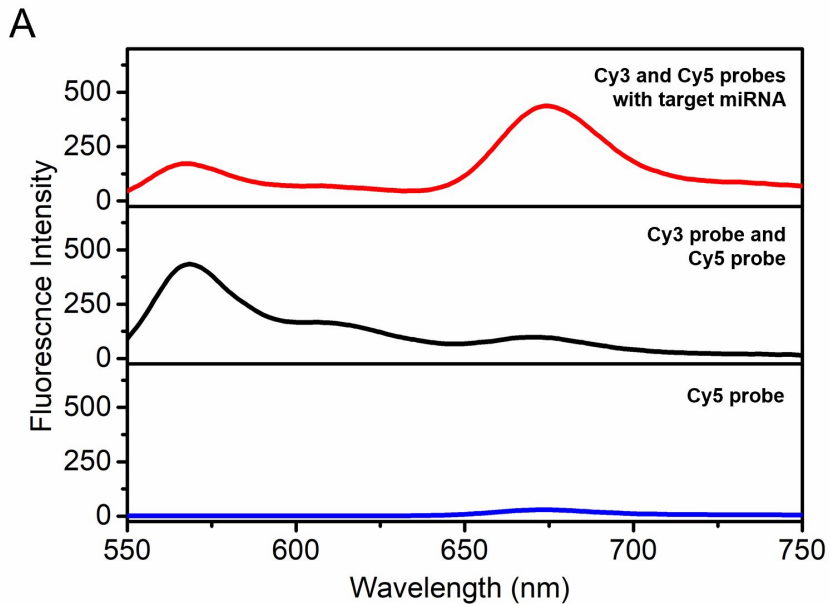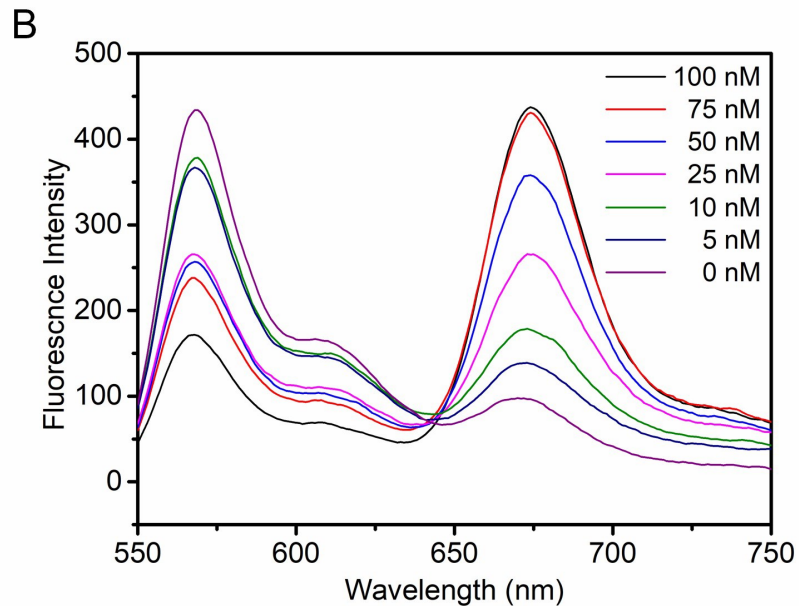

Supplement: d1an00324k3.pdf [file d1an00324k3.pdf]
